# Supplementary material for: Gene Editing of the Catfish Gonadotropin-Releasing Hormone Gene and Hormone Therapy to Control the Reproduction in Channel Catfish, Ictalurus punctatus
Source: MDPI journal article supplement (doi:10.3390/biology11050649), 2022-04-24
Supplement: s1 [file s1]

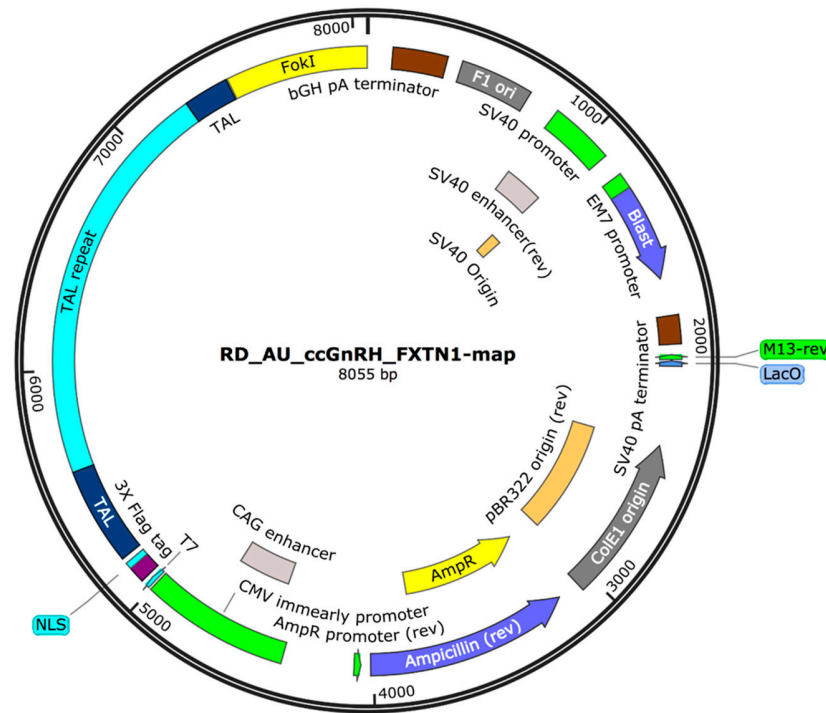

**Figure S1. Schematic representation of transcription activator-like effector nucleases (TALENs) plasmid structure targeting catfish type gonadotropin-releasing hormone (cfGnRH) gene of channel catfish (*Ictalurus punctatus*).**

CMV *prmt* cytomegalovirus promoter, NLS nuclear localization signal, BGH pA bovine growth hormone polyadenylation signal, *AmpR* ampicillin resistance gene.

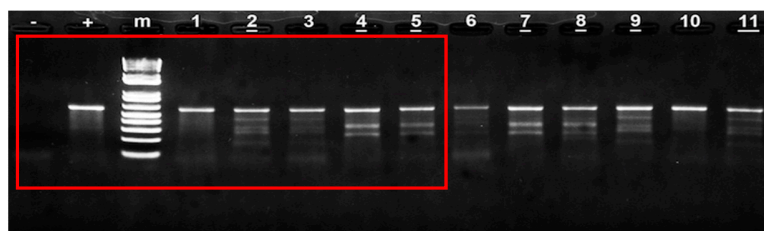

**Figure S2. Original images of gels.**

The result of Surveyor mutation detection in Figure 1 was shown. Red box represents the cropped area.

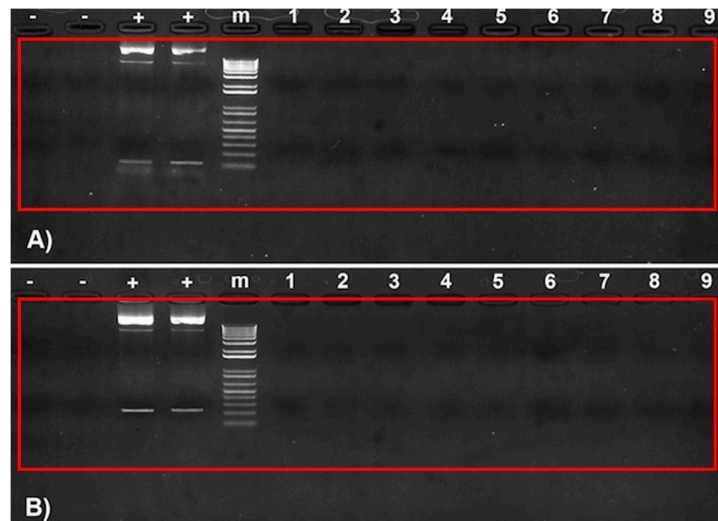

**Figure S3. Original images of gels.**

Results of Surveyor mutation detection in Figure 3A,B were shown. Red box represents the cropped area.

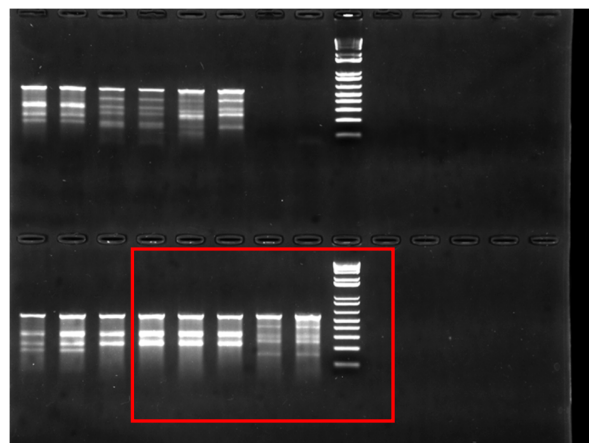

**Figure S4. Original images of gels.**

The results of Surveyor mutation detection in Figure 5 were shown. Red box represents the cropped area.

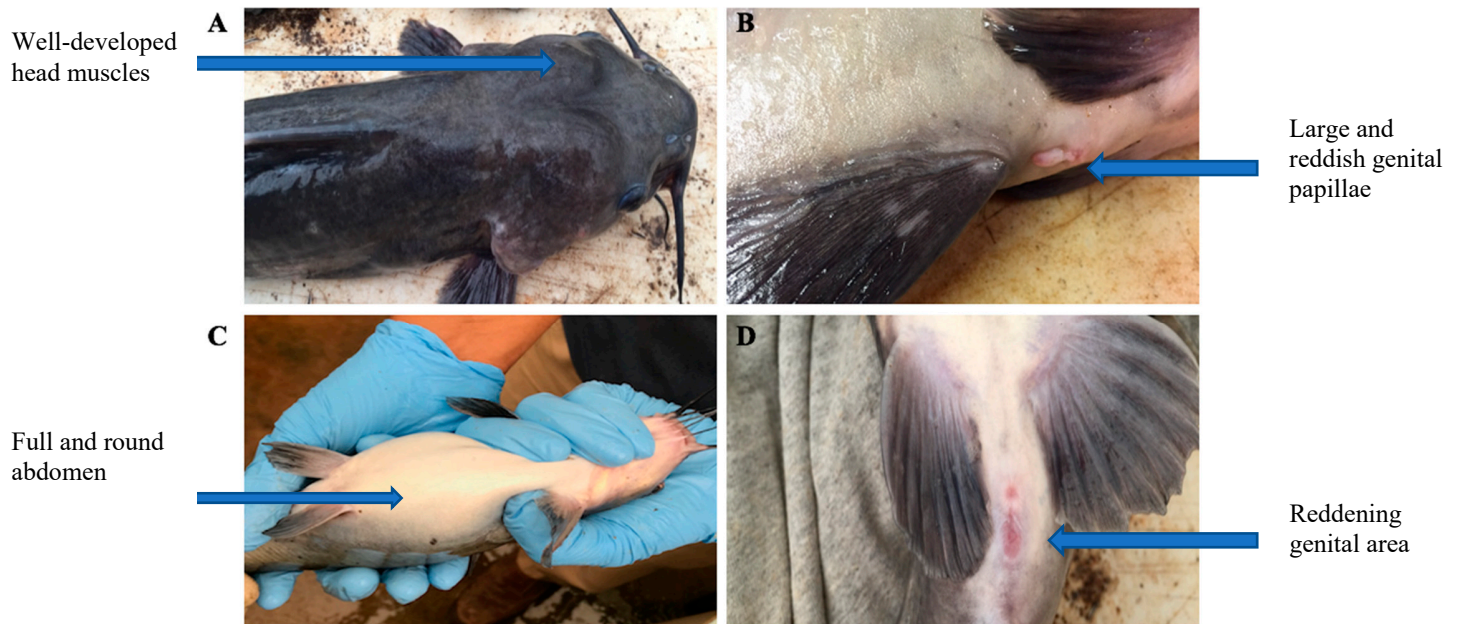

**Figure S5. Images of the spawned P<sub>1</sub> fish with outstanding secondary sexual characteristics.**

**A** showed the spawned male fish with well-developed head muscles.

**B** showed the spawned male fish with large and reddish genital papillae.

**C** showed the spawned female fish with full and round abdomen.

**D** showed the spawned female fish with reddening genital area.
